# Supplementary material for: A dopamine electrochemical sensor based on a platinum–silver graphene nanocomposite modified electrode
Source: Royal Society of Chemistry journal article supplement (doi:10.1039/c9ra11056a), 2020-01-01
Supplement: c9ra11056a1.pdf [file c9ra11056a1.pdf]

## Supporting Information

Dopamine electrochemical sensor based on a platinum-silver graphene nanocomposite modified electrode - Nadzirah Sofia Anuar, Md. Shalauddin, Shamima Akhter, Wan Jeffrey Basirun

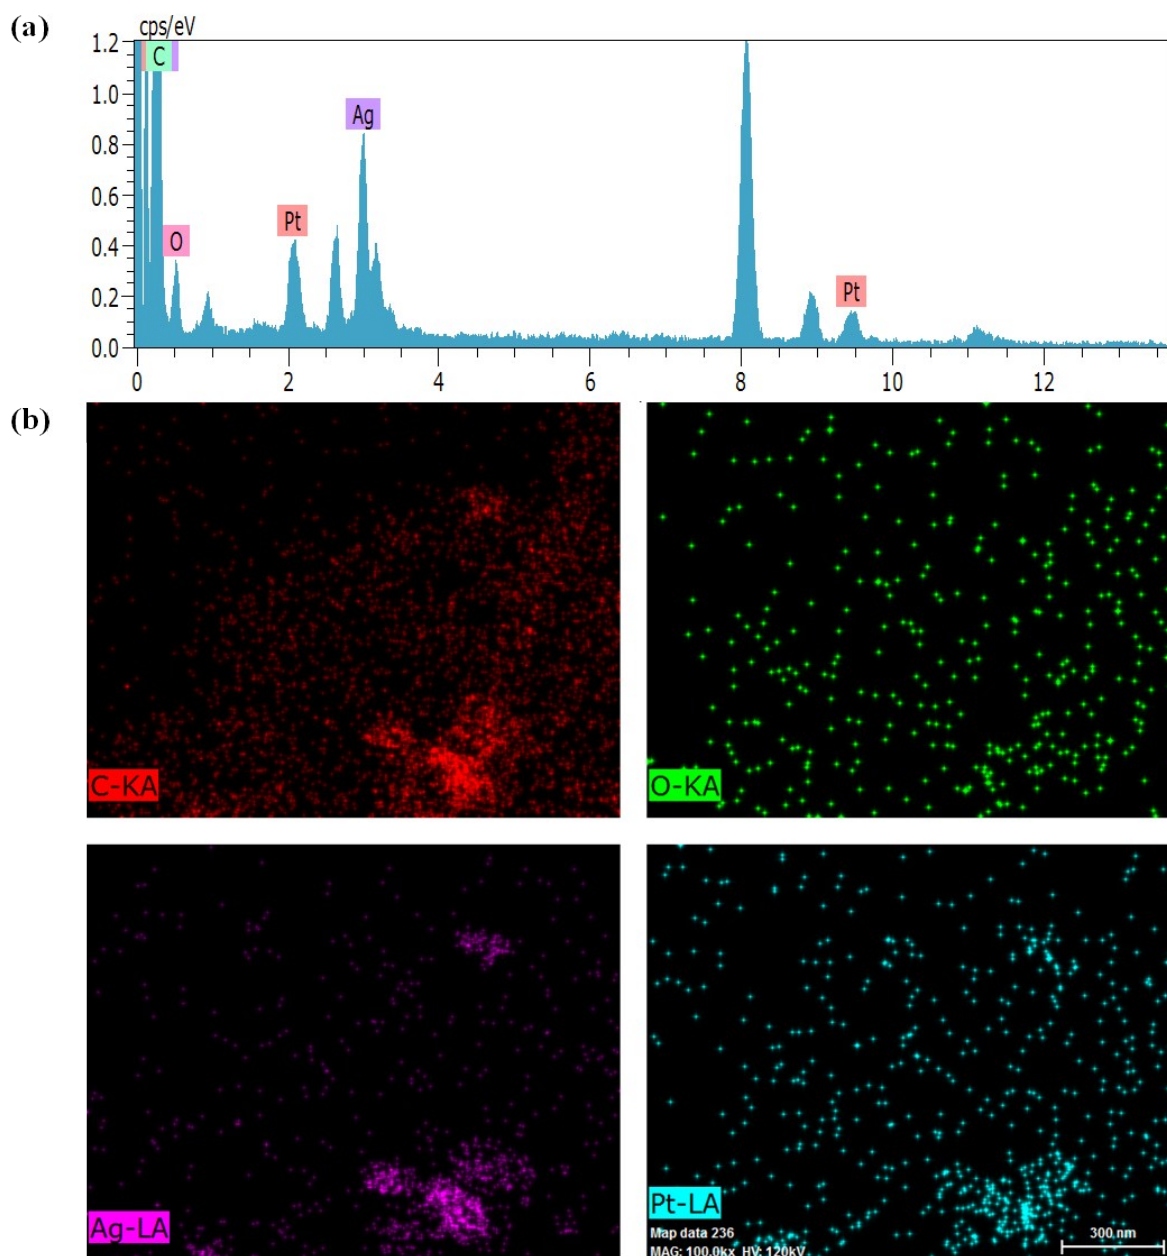

**Fig. S1.** (a) EDX spectra of Pt-Ag/Gr. (b) Elemental mapping images of carbon, oxygen, silver and platinum.

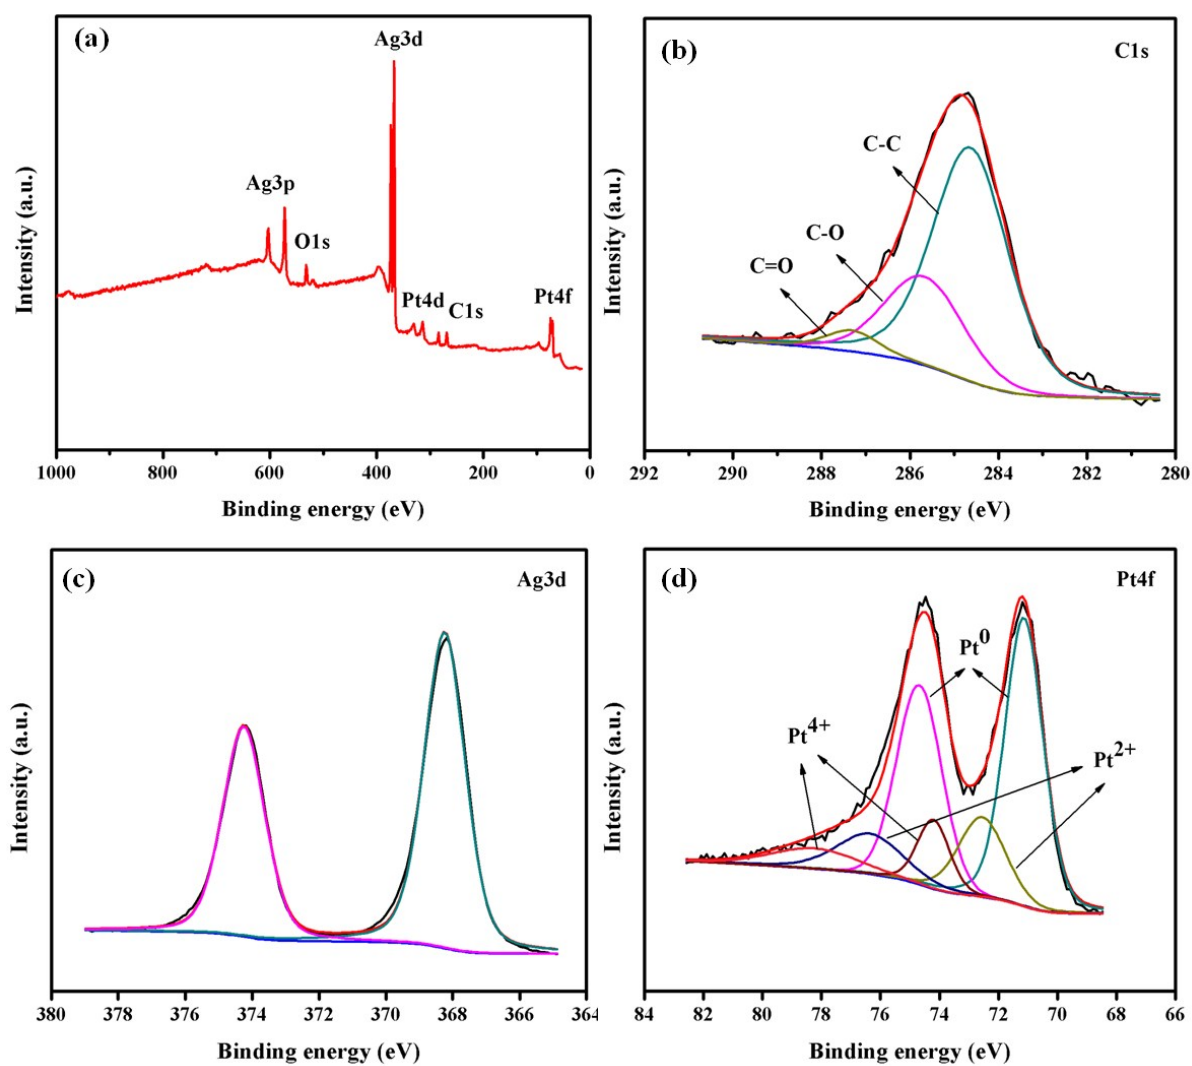

**Fig. S2.** XPS spectra of Pt-Ag/Gr nanocomposite: (a) Survey scan. High-resolution of (b) C 1s, (c) Ag 3d and (d) Pt 4f.

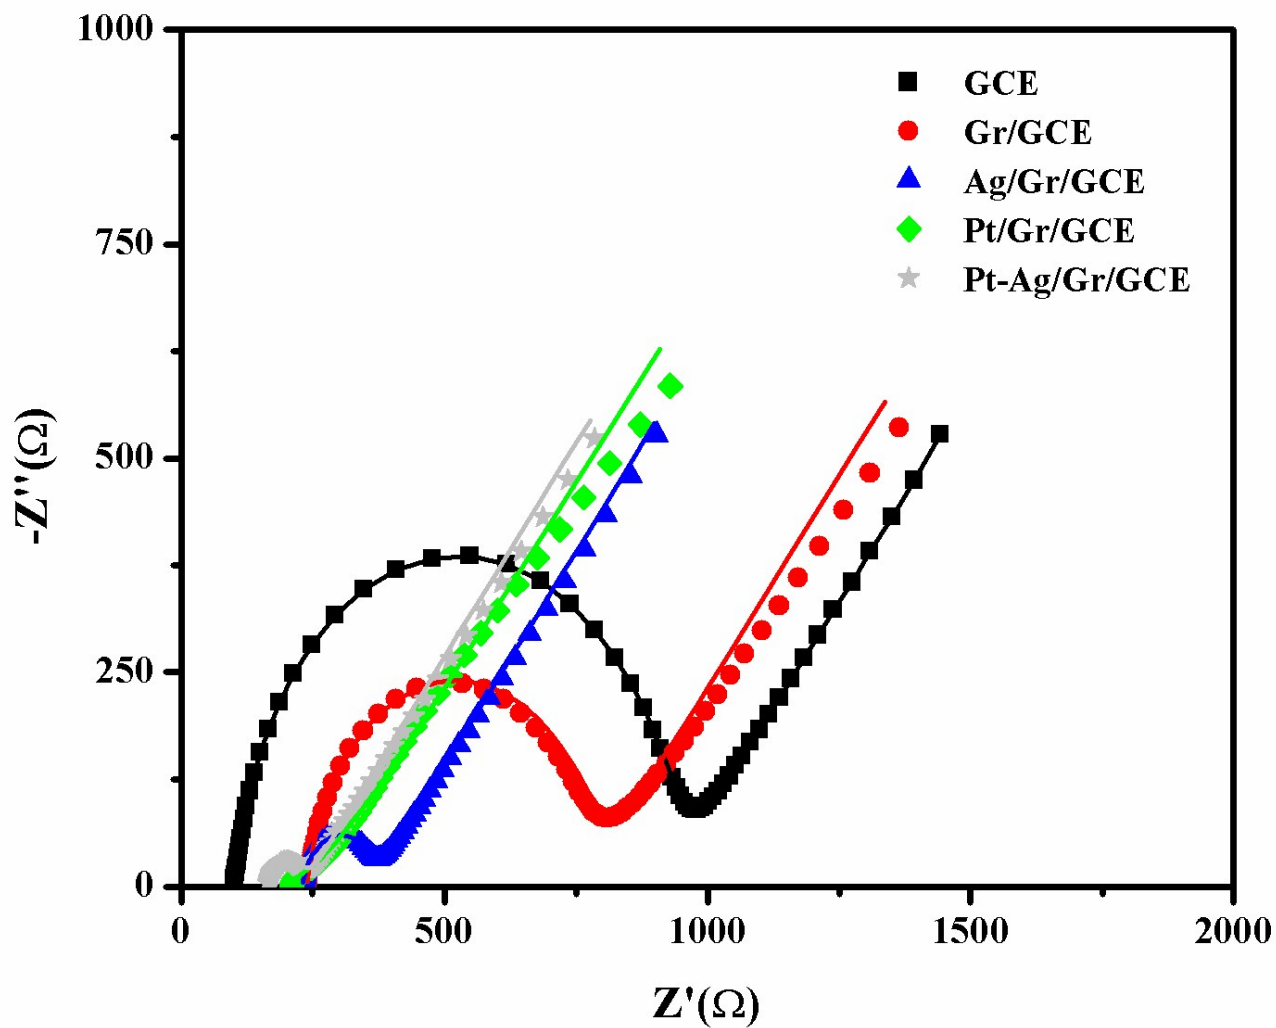

**Fig. S3.** Nyquist plots of (a) bare GCE, (b) Gr/GCE (c) Ag/Gr/GCE, (d) Pt/Gr/GCE, (e) Pt-Ag/Gr/GCE in 0.1 M KCl with 5.0 mM Fe  $[(CN)_6]^{3-/4-}$ .

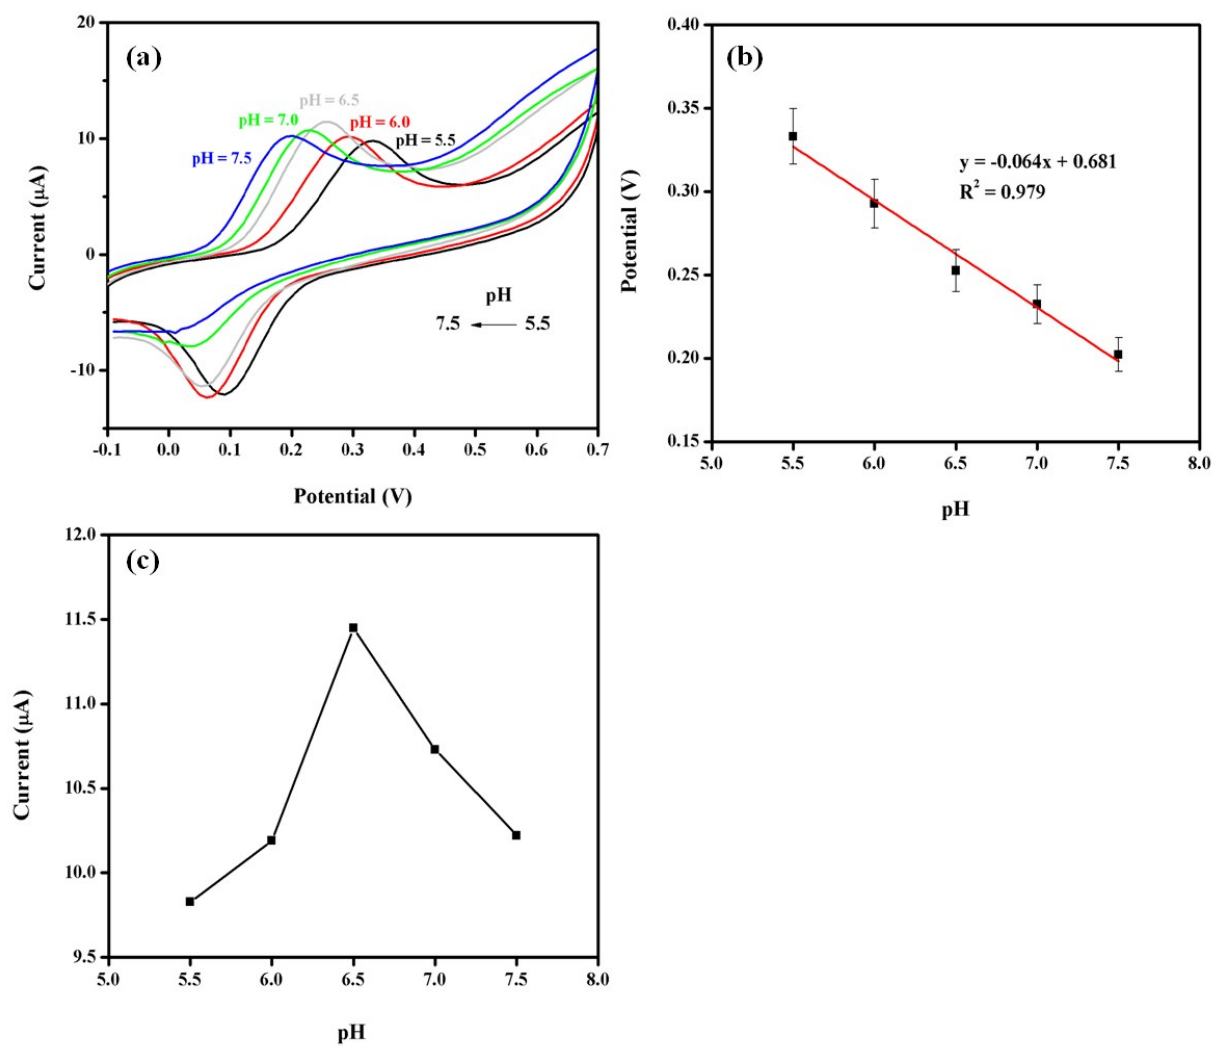

**Fig. S4.** (a) Cyclic voltammograms of 25 μM DA on Pt-Ag/Gr/GCE at various pH values: 5.5, 6.0, 6.5, 7.0 and 7.5. (b) The dependence of oxidation peak potential on pH values. (c) The dependence of oxidation peak current on pH values.

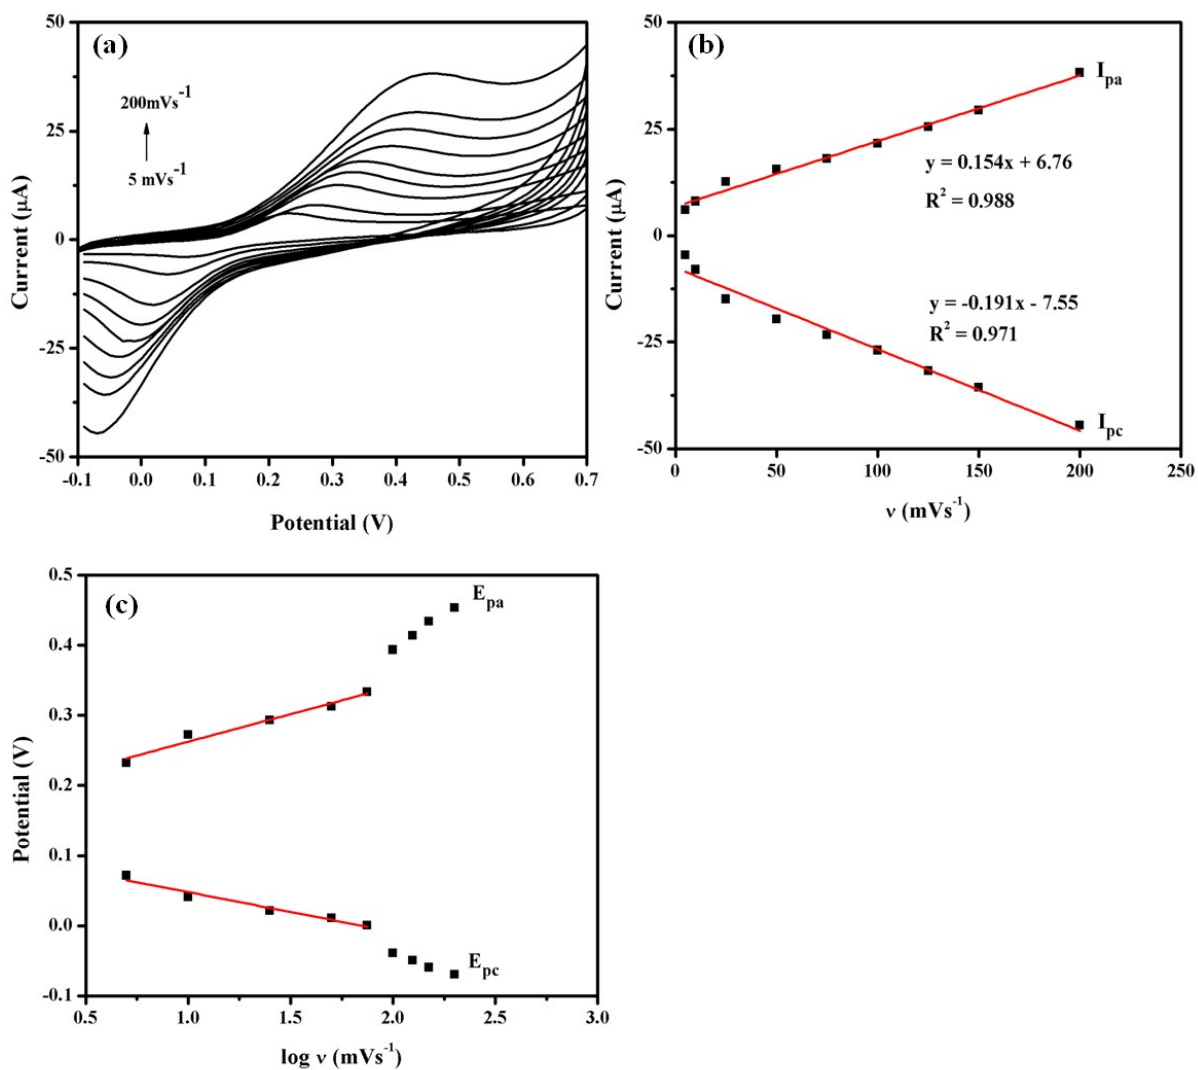

**Fig. S5.** (a) Cyclic voltammograms of Pt-Ag/Gr/GCE in 25  $\mu\text{M}$  DA at scan rates from 5 to 200  $\text{mV s}^{-1}$ . (b) Variation of the redox peak current and scan rate. (c) Variation of the redox peak potential and log of scan rate.

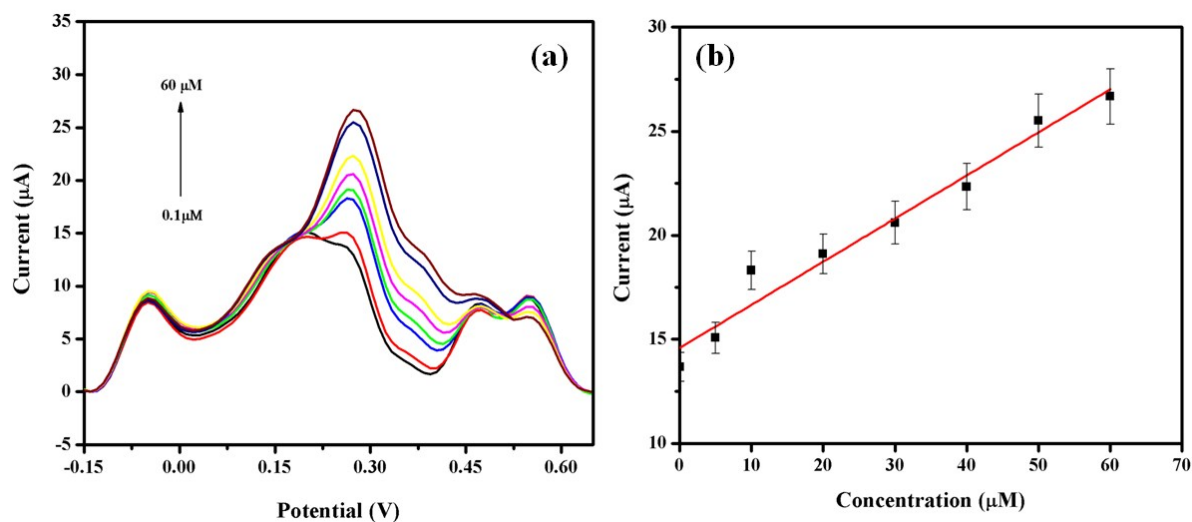

**Fig. S6.** (a) Differential pulse voltammograms of 1.0 mM AA, 100 $\mu\text{M}$  PAP, 100  $\mu\text{M}$  AC, 100  $\mu\text{M}$  UA and different DA concentrations (0.1, 5, 10, 20, 30, 40, 50, 60  $\mu\text{M}$ ) at Pt-Ag/Gr/GCE in 0.1 mol L<sup>-1</sup> PBS at pH 6.5. (b) Relationship of peak current and DA concentration.
